# Supplementary material
Source: PubMed Central journal article supplement (PMC3716089)
Supplement: JCM.03049-12_zjm999092517so1.pdf [file JCM.03049-12_zjm999092517so1.pdf]

**Supplemental table.** Relationship between quinolone resistance determining region (QRDR) sequences and levofloxacin susceptibility of clinical *Escherichia coli* isolates.

| Amino acid substitutions |       |       |       | No. of isolates | Levofloxacin MIC ( $\mu\text{g/ml}$ ) <sup>a</sup> |      |      |      |      |        |   |   |   |       |        |
|--------------------------|-------|-------|-------|-----------------|----------------------------------------------------|------|------|------|------|--------|---|---|---|-------|--------|
| GyrA                     |       | ParC  |       |                 | $\leq 0.016$                                       | 0.03 | 0.06 | 0.13 | 0.25 | 0.5    | 1 | 2 | 4 | 8     | >8     |
| Ser83                    | Asp87 | Ser80 | Glu84 |                 |                                                    |      |      |      |      |        |   |   |   |       |        |
|                          |       |       |       | 81              | 54 (3)                                             | 21   | 6    |      |      |        |   |   |   |       |        |
| Leu                      |       |       |       | 20              |                                                    |      |      | 3    | 2    | 11 (2) | 4 |   |   |       |        |
|                          | Gly   |       |       | 1               |                                                    |      | 1    |      |      |        |   |   |   |       |        |
|                          | Asn   |       |       | 1               |                                                    |      |      | 1    |      |        |   |   |   |       |        |
| Leu                      |       | Ile   |       | 1               |                                                    |      |      |      |      |        |   | 1 |   |       |        |
| Leu                      |       |       | Gly   | 1               |                                                    |      |      |      |      |        | 1 |   |   |       |        |
| Leu                      | Asn   | Ile   |       | 4               |                                                    |      |      |      |      |        |   |   |   | 2     | 2 (1)  |
| Leu                      | Asn   | Ile   | Gly   | 1               |                                                    |      |      |      |      |        |   |   |   |       | 1      |
| Leu                      | Asn   | Ile   | Arg   | 3               |                                                    |      |      |      |      |        |   |   |   |       | 3 (3)  |
| Leu                      | Asn   | Ile   | Val   | 27              |                                                    |      |      |      |      |        |   |   |   | 3 (1) | 24 (8) |
| Total                    |       |       |       | 140             | 54                                                 | 21   | 7    | 4    | 2    | 11     | 5 | 1 | 0 | 5     | 30     |

<sup>a</sup> No. of ESBL producing isolates is shown within brackets.
